# Supplementary material for: Hydrogenated group-IV binary monolayers: a new family of inversion-asymmetric topological insulators
Source: Royal Society of Chemistry journal article supplement (doi:10.1039/c6ra14140d), 2016-01-01
Supplement: c6ra14140d1.pdf [file c6ra14140d1.pdf]

## Supplementary Information

### Hydrogenated Group-IV Binary Monolayers: A New Family Inversion-Asymmetric Topological Insulators

Shou-juan Zhang,<sup>a</sup> Wei-xiao Ji,<sup>a</sup> Chang-wen Zhang,<sup>a\*</sup> Sheng-shi Li,<sup>b</sup> Ping Li,<sup>a</sup> Miao-juan Ren,<sup>a</sup> and Pei-ji Wang<sup>a</sup>

<sup>a</sup> School of Physics and Technology, University of Jinan, Jinan, Shandong, 250022, People's Republic of China

<sup>b</sup> School of Physics, State Key laboratory of Crystal Materials, Shandong University, Jinan, Shandong, 250100, People's Republic of China

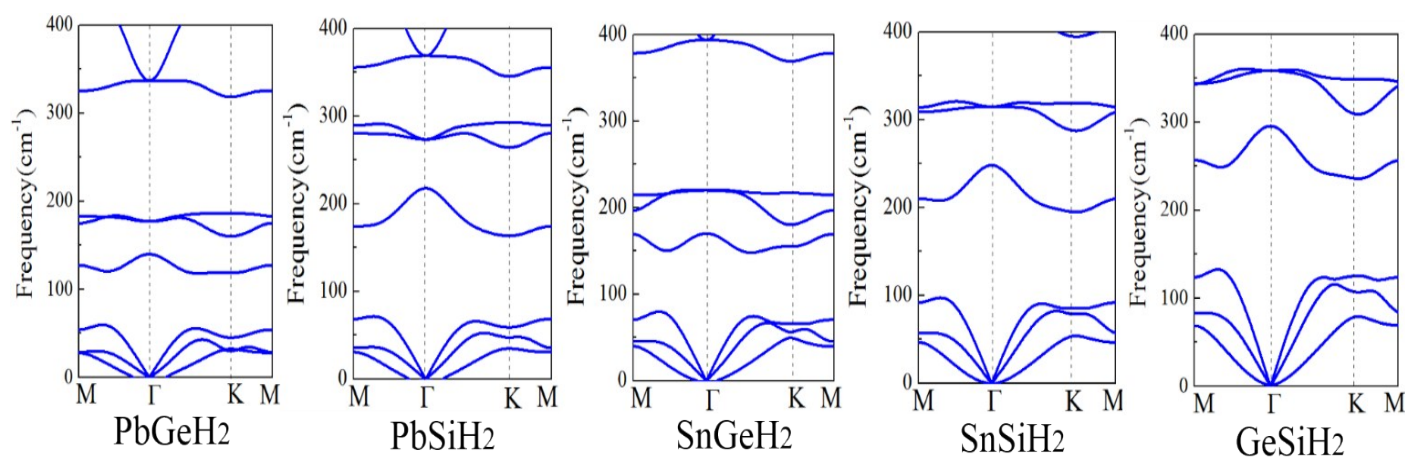

**Fig. S1** The calculated phonon band spectrum for PbGeH<sub>2</sub>, PbSiH<sub>2</sub>, SnGeH<sub>2</sub>, SnSiH<sub>2</sub>, GeSiH<sub>2</sub> films, respectively.
